# Supplementary material for: Mesoporous RuO2/TiO2 composites prepared by cyclodextrin-assisted colloidal self-assembly: towards efficient catalysts for the hydrogenation of methyl oleate
Source: Royal Society of Chemistry journal article supplement (doi:10.1039/c5ra27161d), 2016-01-01
Supplement: c5ra27161d1.pdf [file c5ra27161d1.pdf]

# Mesoporous RuO<sub>2</sub>/TiO<sub>2</sub> Composites Prepared by Cyclodextrin-Assisted Colloidal Self-Assembly: Towards Efficient Catalysts for the Hydrogenation of Methyl Oleate

Rudina Bleta,<sup>\*a</sup> Sébastien Noël,<sup>a</sup> Ahmed Addad,<sup>b</sup> Anne Ponchel<sup>a</sup> and Eric Monflier<sup>a</sup>

<sup>a</sup>Univ. Artois, CNRS, Centrale Lille, ENSCL, Univ. Lille, UMR 8181, Unité de Catalyse et de Chimie du Solide (UCCS), F-62300 Lens, France. *E-mail* : [rudina.bleta@univ-artois.fr](mailto:rudina.bleta@univ-artois.fr)

<sup>b</sup>Univ. Lille, CNRS, INRA, ENSCL, UMR 8207 - UMET - Unité Matériaux et Transformations, F-59000 Lille, France.

## **Experimental**

Transmission Electron Microscopy (TEM) observations on reduced Ru(0)/TiO<sub>2</sub>-sg and Ru(0)/TiO<sub>2</sub>-ns catalysts were performed using a JEOL JEM-2100 high resolution microscope equipped with an Orius SC 200 high-speed digital camera (Gatan) at an acceleration voltage of 200 kV. The Ru(0)/TiO<sub>2</sub> powders were deposited directly on the surface of a carbon coated copper grid before observation.

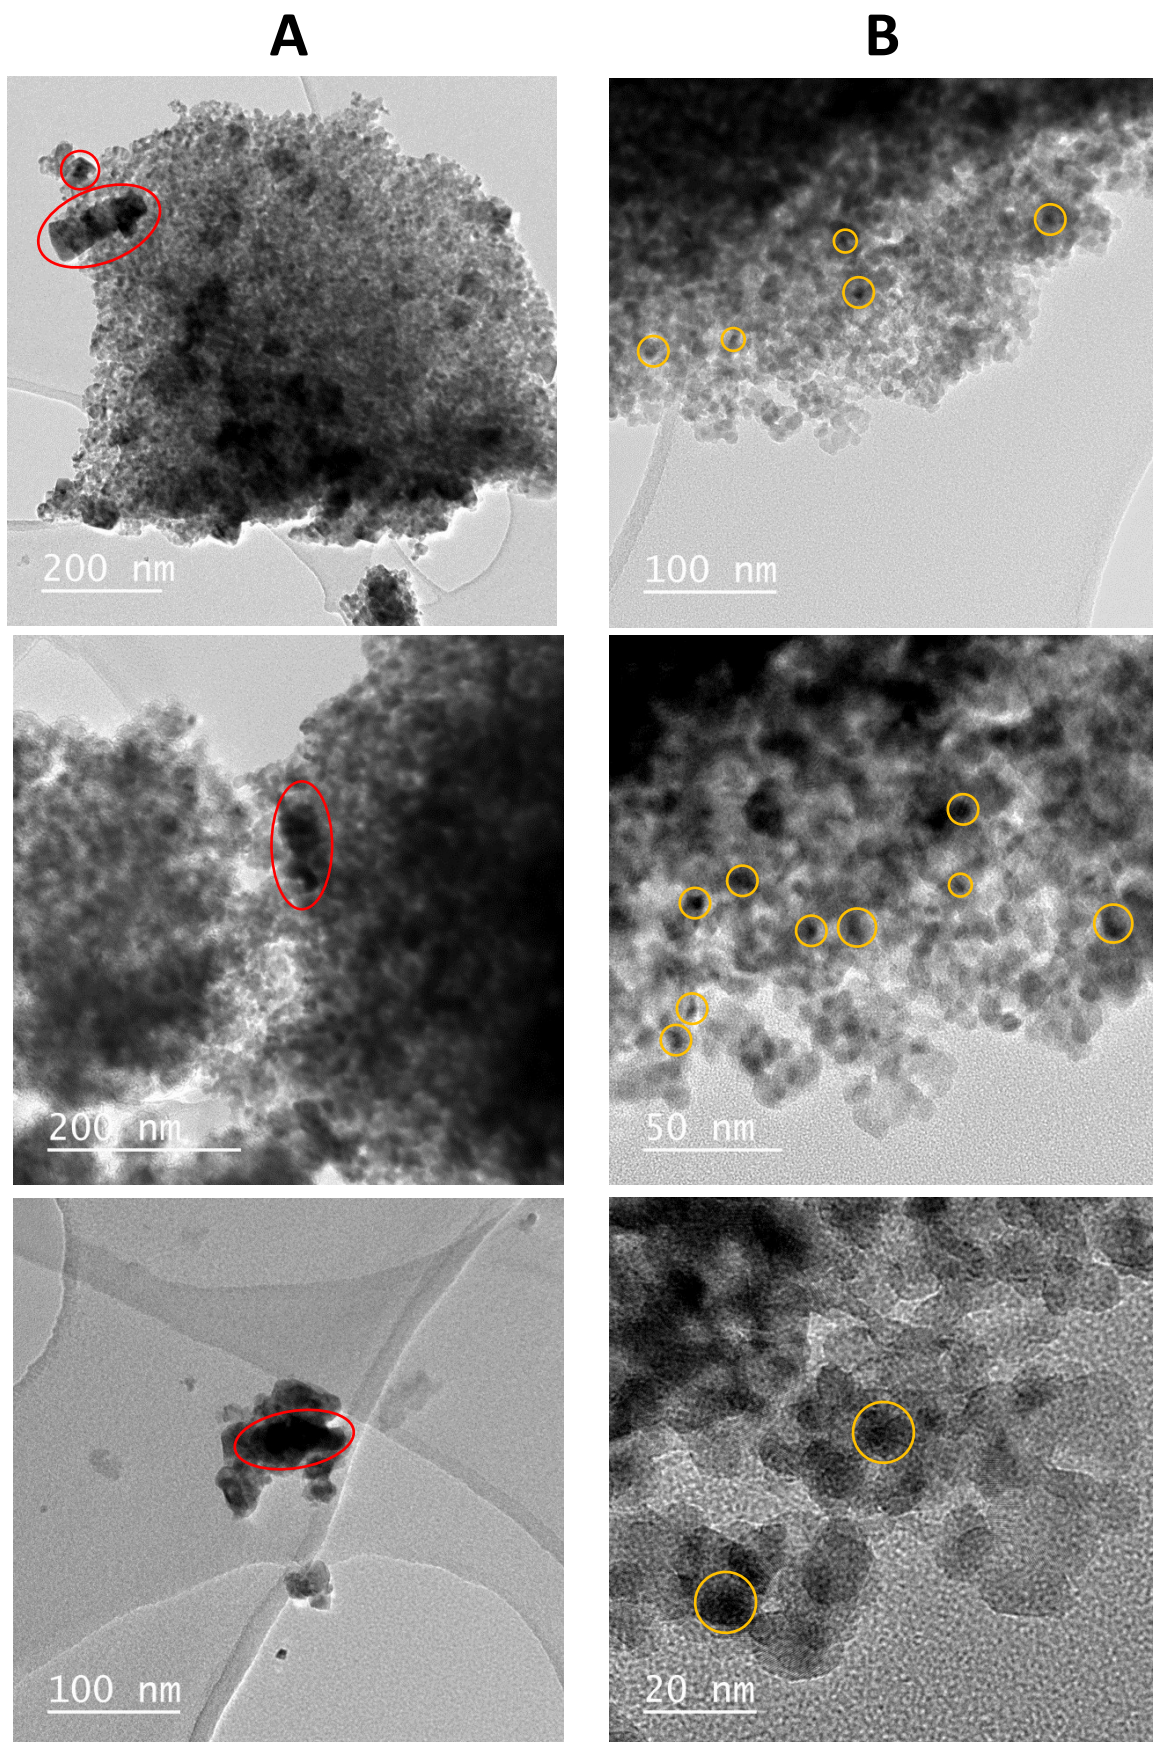

**Fig.S1** TEM analyses on reduced  $\text{Ru}(0)/\text{TiO}_2\text{-sg}$  (A) and  $\text{Ru}(0)/\text{TiO}_2\text{-ns}$  (B) catalysts.
